# Supplementary material for: Nucleolus-tethering system (NoTS) reveals that assembly of photobodies follows a self-organization model
Source: PubMed Central journal article supplement — Mol Biol Cell. 2014 Apr 15;25(8):1366–73. doi: 10.1091/mbc.E13-09-0527 (PMC3983000; doi:10.1091/mbc.e13-09-0527), 2014-04-15
Supplement: supp_E13-09-0527v1_theCombinedSupMats.pdf [file supp_E13-09-0527v1_theCombinedSupMats.pdf]

# Supplemental Materials

*Molecular Biology of the Cell*

Liu et al.

## Supplemental Materials

### Supplemental Information

**Figure S1. Cells expressing Nuc2-COP1-YFP under control of CaMV35S promoter in *cop1-6* mutant background (Nuc2-COP1-YFP *ox/cop1-6*) have similar transcription levels of 18S and 25S rRNAs to those in wild type.**

**Figure S2. The interaction between HYL1 and DCL1 revealed the tethering ability and efficiency of NoTS system. (A)** HYL1 concentrated in nuclear dicing bodies and did not co-localize with Nuc2. **(B)** Nuc2-HYL1 fusion, which was tethered to nucleolus, successfully recruited DCL1, a large protein, to nucleolus because of the interaction between HYL1 and DCL1. Bars, 5  $\mu$ m.

**Figure S3. Nuc2-COP1 relocated from nucleoplasm to the nucleolus. (A)** Subcellular localization of Nuc2-COP1 fusion protein. COP1 was tethered to the periphery of the nucleolus by Nuc2 in addition to a diffuse signal in nucleolus. **(B)** Subcellular localization of COP1. COP1 formed discrete bodies in the nucleoplasm, not co-localizing with Nuc2 which labels the nucleolus. Bars, 5  $\mu$ m.

**Figure S4. Nuc2-COP1 failed to recruit phytochromes phyA and phyB to the nucleolus. (A)** Phytochromes phyA and phyB were not recruited to the nucleolus when co-expressed with Nuc2-COP1. **(B)** Phytochromes phyA and phyB did not co-localize with Nuc2 in nucleolus. The nucleolus is labeled by Nuc2-mCherry. Bars, 5  $\mu$ m.

**Figure S5. The *de novo* formed bodies at the periphery of nucleolus are functional photobodies. (A)** The tobacco epidermal cells expressing COP1-YFP were imaged before and after photobleaching. Bar, 10  $\mu$ m. **(B)** The tobacco epidermal cells expressing Nuc2-COP1-YFP were imaged before and after photobleaching. Bar, 10  $\mu$ m. **(C)** The dynamics of recovery after bleaching of COP1-YFP body. **(D)** The dynamics of recovery after bleaching of Nuc2-COP1-YFP body. **(E)** Transgenic line with relocated nuclear bodies formed by Nuc2-COP1-YFP can complement the developmental defects of *cop1-6*

mutant. The plants are 28-day old. Bar, 2 cm.

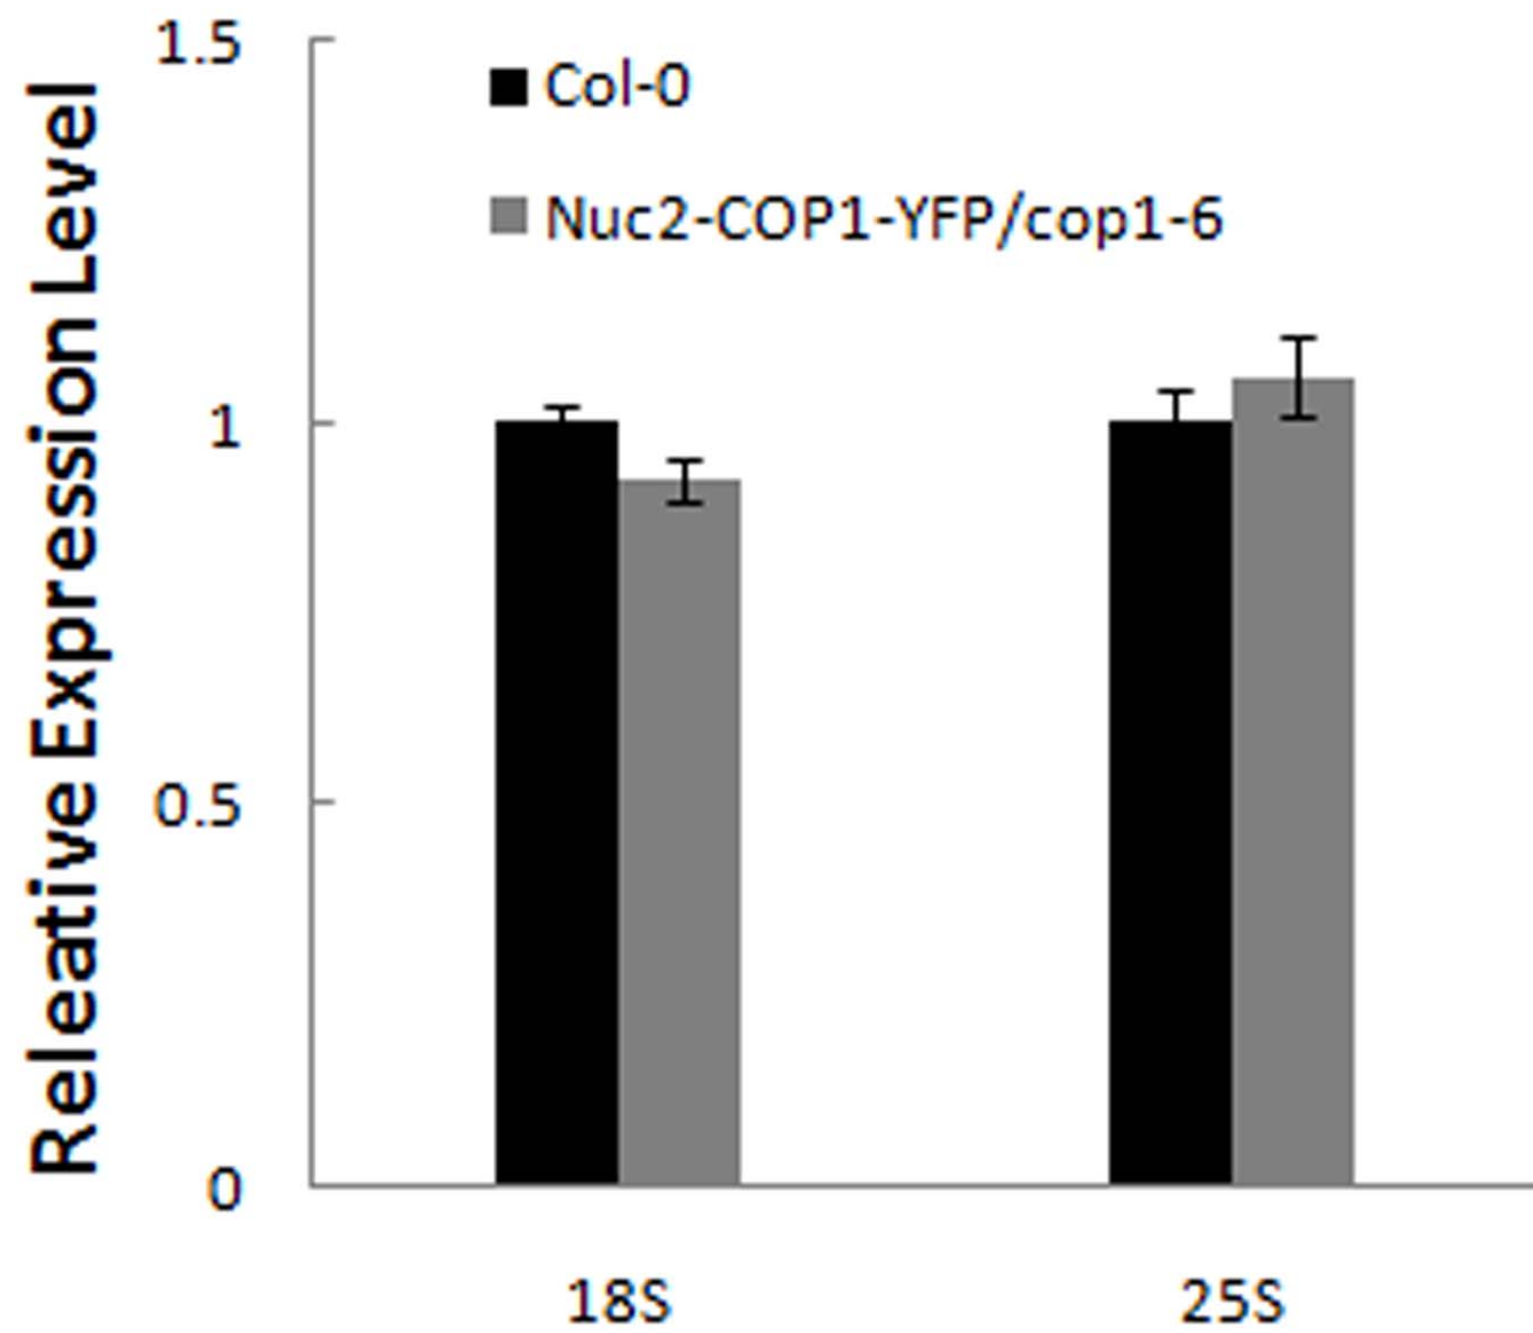

**A**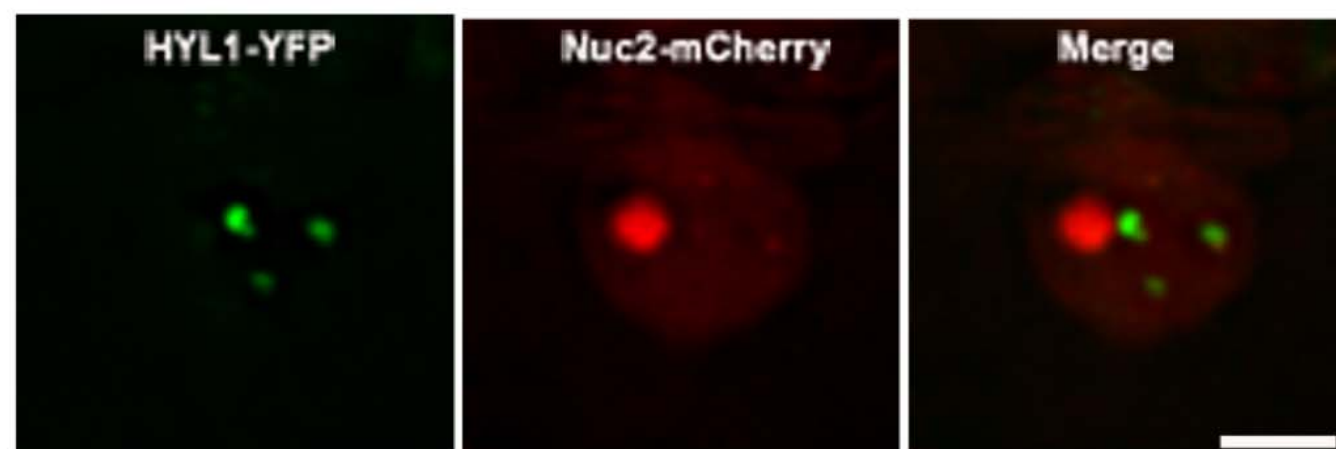**B**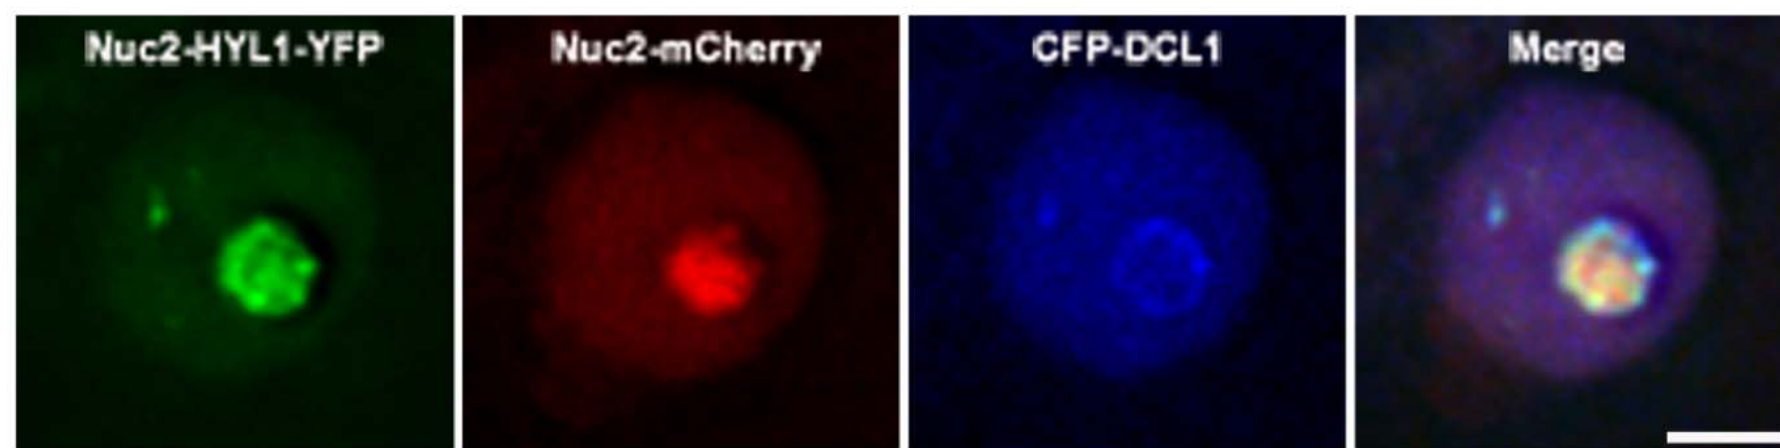

**A**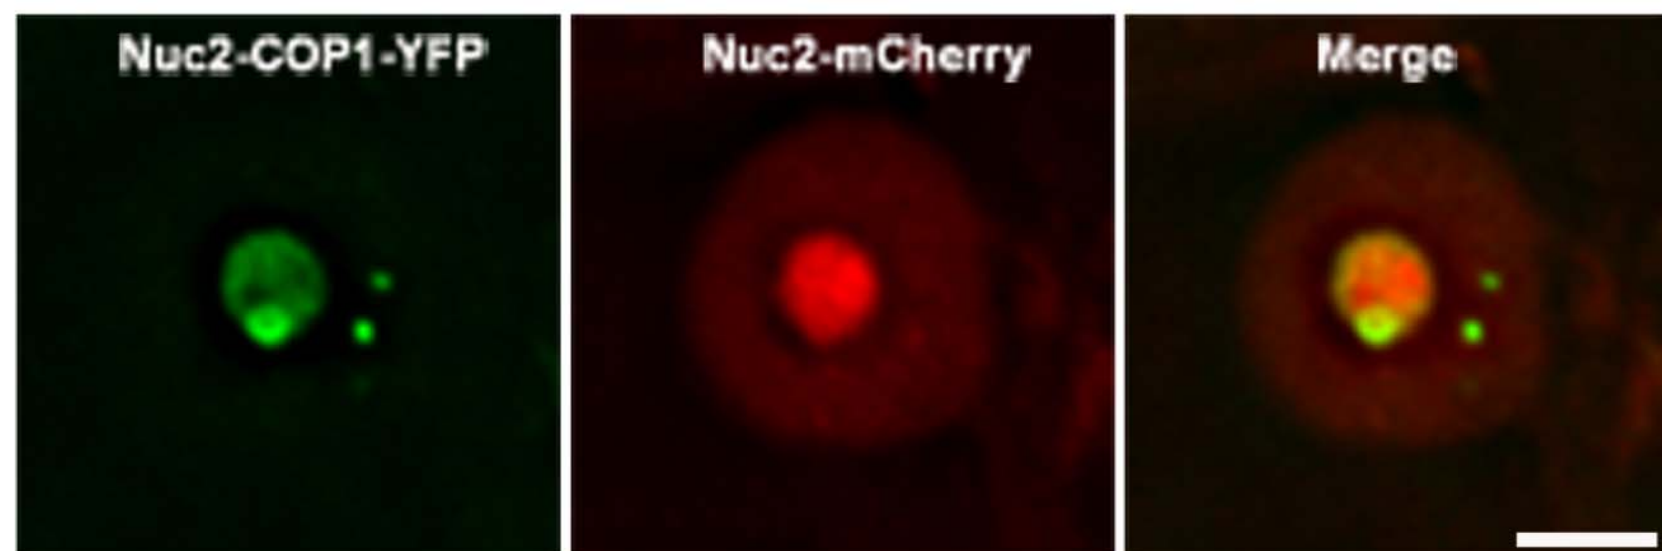**B**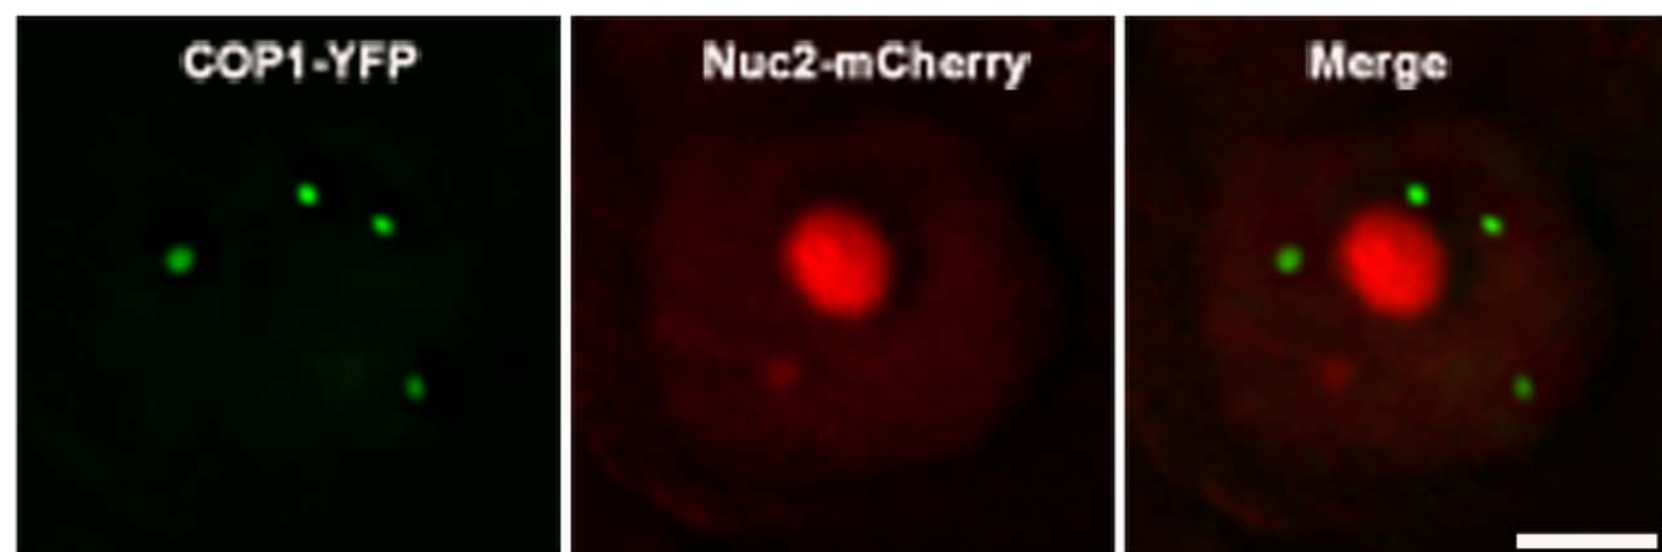

**A**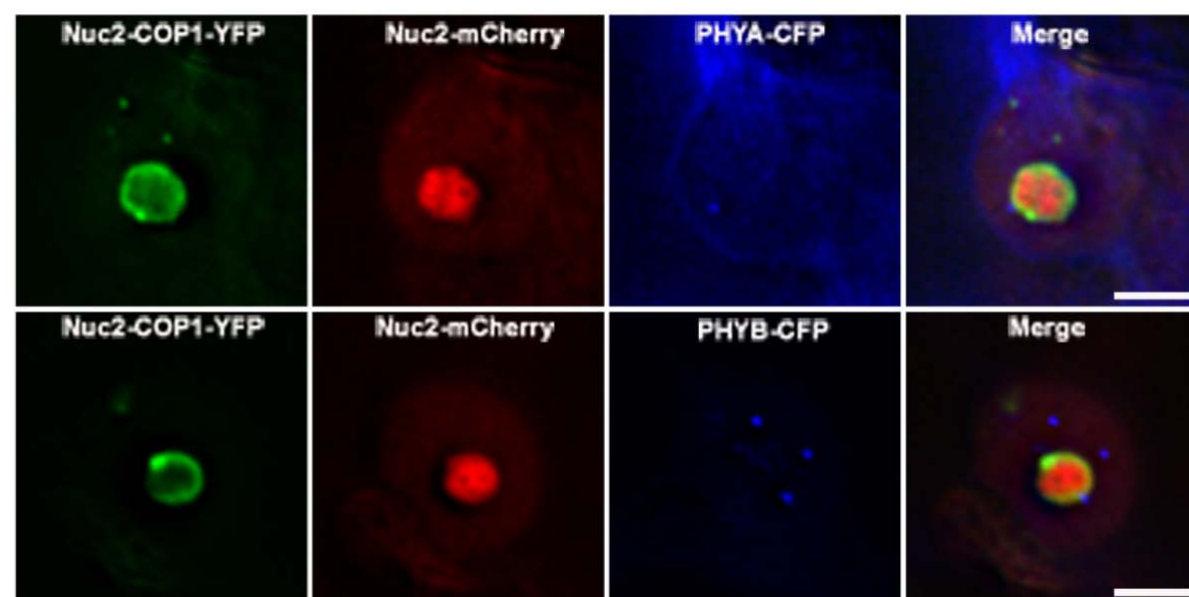**B**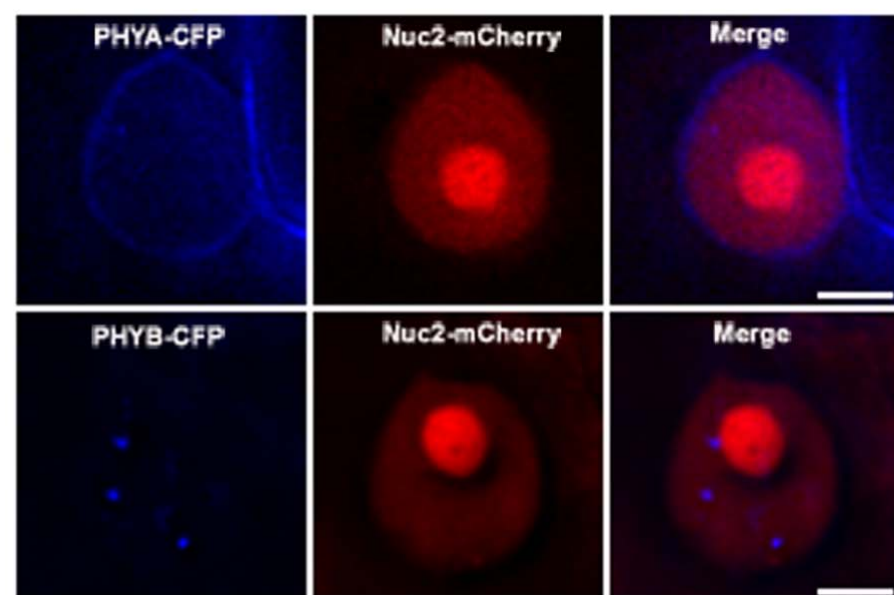

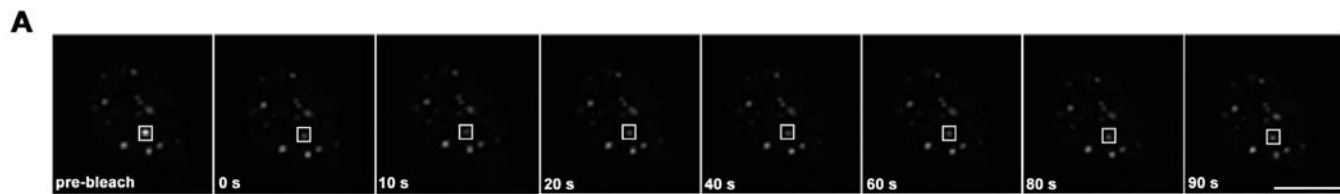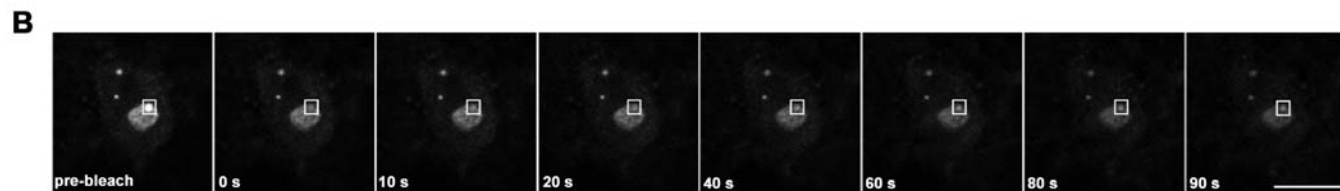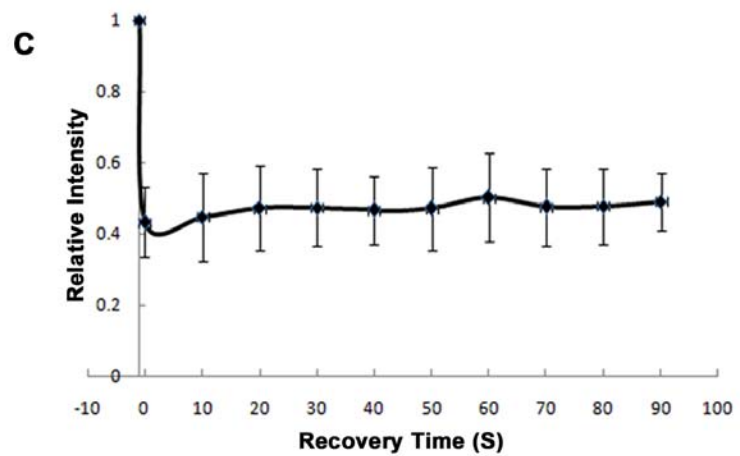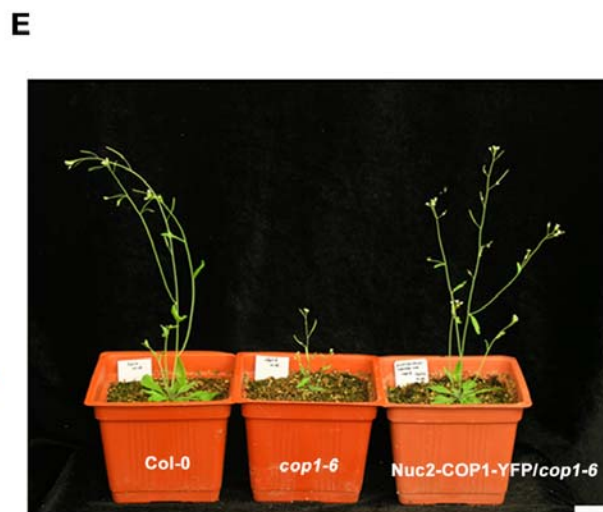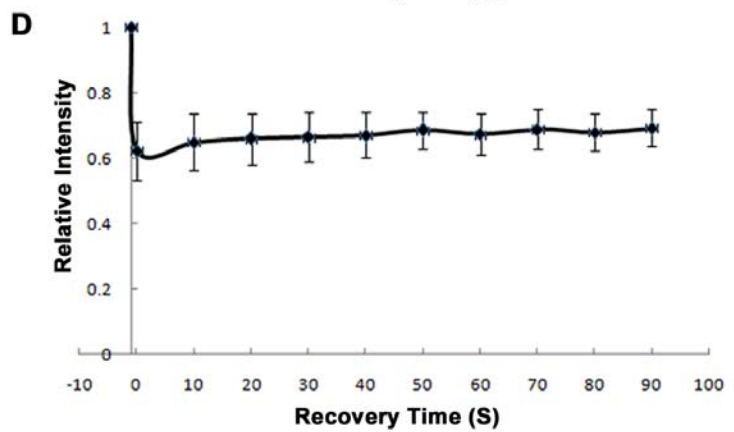



## Supplemental Table 1: Primers used in this study

| Primers                        | Sequences                            |
|--------------------------------|--------------------------------------|
| SalI-COP1CDS-5'-F              | CCCGTCGACATGGAAGAGATTTTCGACGGATCCGG  |
| SpeI-COP1CDS-3'-R              | CCCCTAGTCGCAGCGAGTACCAGAACTTTG       |
| SalI-COP1( $\Delta$ WD40)-5'-F | NNNGTCGACATGGAAGAGATTTTCGACGGATCC    |
| SpeI-COP1( $\Delta$ WD40)-3'-R | NNNACTAGTATAAATTGCCTACAAAATTTCTCTCTC |
| SalI-phyACDS-5'-F              | NNNGTCGACATGTCAGGCTCTAGGCCGACTC      |
| SpeI-phyACDS-3'-R              | NNNACTAGTCTTGTGTTGCTGCAGCGAGTTC      |
| XbaI-phyBCDS-5'-F              | NNNTCTAGAATGGTTTCCGGAGTCGGGGGT       |
| XbaI-phyBCDS-3'-R              | NNNTCTAGAATATGGCATCATCAGCATCATGTCA   |
| SalI-cry1CDS-5'-F              | NNNGTCGACATGTCTGGTTCTGTATCTGGTTGTG   |
| SpeI-cry1CDS-3'-R              | NNNACTAGTCCCGGTTTGTGAAAGCCGTCTC      |
| SalI-cry2CDS-5'-F              | NNNGTCGACATGAAGATGGACAAAAAGACTATAG   |
| SpeI-cry2CDS-3'-R              | NNNACTAGTTTTGCAACCATTTTTTCCCAAAC     |
| SalI-UVR8CDS-5'-F              | NNNGTCGACATGGCGGAGGATATGGCTGC        |
| SpeI-UVR8CDS-3'-R              | NNNACTAGTAATTCGTACACGCTTGACATCAGT    |
| SalI-HY5CDS-5'-F               | NNNGTCGACATGCAGGAACAAGCGACTAGCT      |
| SpeI-HY5CDS-3'-R               | NNNACTAGTAAGGCTTGCATCAGCATTAGAAC     |
| SalI-PIF7CDS-5'-F              | NNNGTCGACATGTCGAATTATGGAGTTAAAGAGC   |
| SpeI-PIF7CDS-3'-R              | NNNACTAGTATCTCTTTTCTCATGATTCGAAGA    |
| SalI-HFR1CDS-5'-F              | NNNGTCGACATGTCGAATAATCAAGCTTTCATGG   |
| SpeI-HFR1CDS-3'-R              | NNNACTAGTTAGTCTTCTCATCGCATGGGAAGA    |
| SalI-COCDS-5'-F                | NNNGTCGACATGTTGAAACAAGAGAGTAACGAC    |
| SpeI-COCDS-3'-R                | NNNACTAGTGAATGAAGGAACAATCCCATATCCT   |
| SalI-HEMERACDS-5'-F            | NNNGTCGACATGGCGTCAATATCAACCACCAC     |
| SpeI-HEMETACDS-3'-R            | NNNACTAGTAGGATCAGTCTCCTCTTCAAAGTCC   |
| SalI-HYL1CDS-5'-F              | NNNGTCGACATGACCTCCACTGATGTTTCTCT     |
| SpeI-HYL1CDS-3'-R              | NNNACTAGTTGCGTGGCTTGCTTCTGTCT        |
| Actin 2-qPCR-5'-F              | GACCTTTAACTCTCCCGCTATG               |
| Actin 2-qPCR-3'-R              | GAGACACACCATCACCAGAAT                |
| 18S rRNA-qPCR-5'-F             | GAAAGACGAACAACCTGCGAAAG              |
| 18S rRNA-qPCR-3'-R             | GGTTGAGACTAGGACGGTATCT               |
| 25S rRNA-qPCR-5'-F             | GTTCCGACCGCCTTGAATTA                 |
| 25S rRNA-qPCR-3'-R             | CCACTCTGCCACTTACAATACC               |
